# Supplementary material for: Solid Polymer Electrolytes with Flexible Framework of SiO2 Nanofibers for Highly Safe Solid Lithium Batteries
Source: MDPI journal article supplement (doi:10.3390/polym12061324), 2020-06-10
Supplement: s1 [file s1]

*Supporting information:*

Solid polymer electrolytes with flexible framework of SiO<sub>2</sub> nano-fibers  
for highly safe solid lithium batteries

Jin Cui, Zehao Zhou, Mengyang Jia, Xin Chen, Chuan Shi\*, Ning Zhao, Xiangxin Guo\*

College of Physics, Qingdao University, 266071 Qingdao, China.

Corresponding author. Tel.: +86 53285950270.

E-mail address: chuanshu@qdu.edu.cn, xxguo@qdu.edu.cn

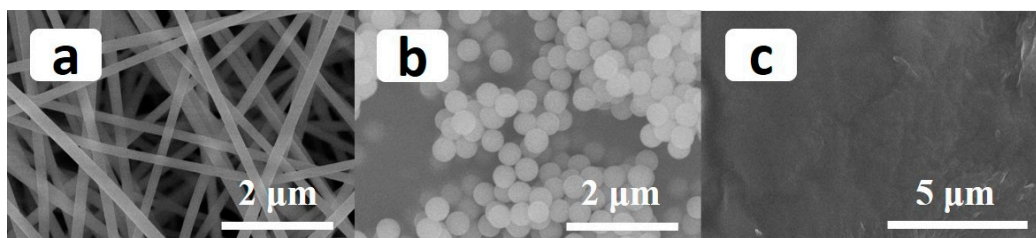

**Fig. S1.** SEM images of (a) the well-organized framework of 3D SiO<sub>2</sub> NFs, (b) the SiO<sub>2</sub> particles. (c) Top view image of PLS

with a smooth surface.

The top-view SEMs of 3D SiO<sub>2</sub> NFs, SiO<sub>2</sub> particles and PLS are shown in Fig. S1. The frameworks of 3D SiO<sub>2</sub> NFs consist of nano-fibers in diameter of approximately 200 nm. In contrast, SiO<sub>2</sub> particles in diameter of approximately 250 nm are prepared, of which SEM images are shown in Fig. S1b.

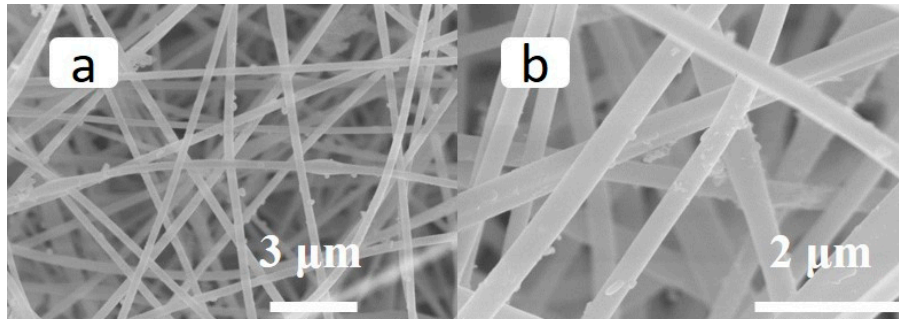

**Fig. S2.** SEMs of PLS/3D SiO<sub>2</sub> NFs after heated with alcohol burner.

After being heated with alcohol burner, the melted PEO is absent while the structure of 3D SiO<sub>2</sub> NFs maintains. This feature is beneficial to avoiding short circuit at elevated temperatures.
